# Supplementary material
Source: Springer Nature journal article supplement (https://www.springermedizin.de/resource/supplementary/13098_2014_375_MOESM2_ESM.pdf/9670920)

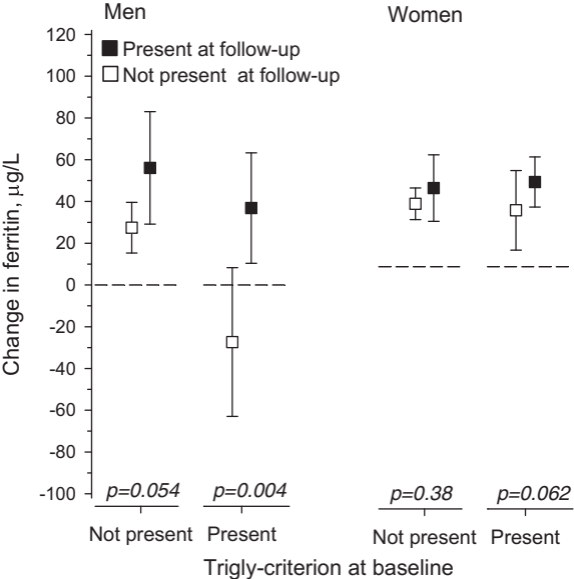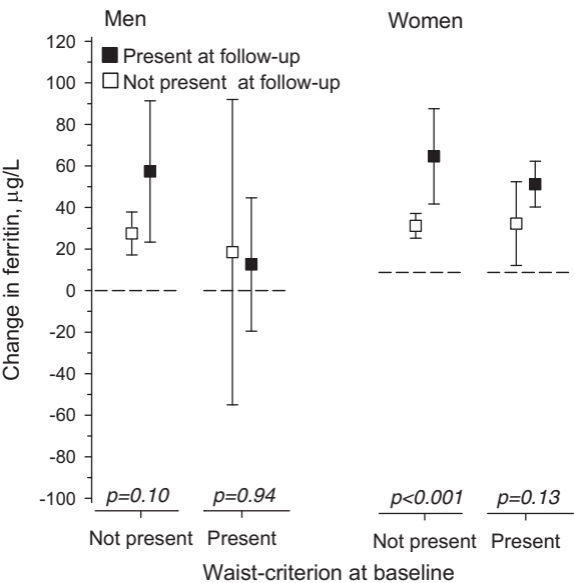

Supplement: MOESM2 [file 9670920]
